# Supplementary material for: Bioactive metabolites and antidiabetic activity of Cannabis sativa-derived endophytic fungi
Source: Research Square preprint supplement (doi:10.21203/rs.3.rs-7549570/v1), 2025-09-12
Supplement: Supplementary file 1 [file f4cd224247dfea9630bae9d4.docx]

**Supplementary Material**

**GC-MS profiling and antidiabetic potential of endophytic fungal extracts isolated from *Cannabis sativa* L. in mouse pancreatic insulinoma 6 (MIN6) β-cells**

S. Agraharia,b, S. P. Singhb, B. N. Singha*

aHerbal Nanobiotechnology Lab, Pharmacology Division, CSIR-National Botanical Research Institute, Lucknow-226001, India

bCentre of Advanced Study in Botany, Department of Botany, Institute of Science, Banaras Hindu University, Varanasi-221005, India

*Correspondence author

Brahma N. Singh ([bn.singh@nbri.res.in](mailto:bn.singh@nbri.res.in))

**Fig. S2.** Morphological and molecular characterization of *N. verrucosum*. (A) Growth on PDA plate. (B) Macroscopic view. (C) SEM view. (D) Phylodiagram generated from ITS sequence analysis of the *A. microsiensis* designates the position of the strain among other related taxa.

**Fig. S3.** Assessment of AmEE and NvEE on MIN6 cells viability by microscopic observations.

**Fig. S4.** FTIR spectra of (A) AmEE and (B) NvEE**.**
